# Supplementary material
Source: publisher figshare collection journal article supplement (https://gsapubs.figshare.com/ndownloader/files/38296707)
Supplement: Supplementary file 1 [file 38296707]

## Sheet: individuals
shell δ13C values of fossil snails from Xifeng section (all individual snails)
depth	age	layer	shell δ13C
0.1	0	S0	-7.276
0.2	1.07	S0	-8.312
0.2	1.07	S0	-8.112
0.4	3.47	S0	-6.761
0.5	5.07	S0	-7.679
0.5	5.07	S0	-5.759
0.6	6.67	S0	-3.438
0.7	8.26	S0	-6.447
0.8	9.6	S0	-4.943
0.8	9.6	S0	-5.516
0.9	10.67	S0	-5.952
1	12	S0	-5.87
1.1	12.63	L1	-5.477
1.1	12.63	L1	-2.132
1.2	13.16	L1	-7.542
1.4	14.03	L1	-6.397
1.4	14.03	L1	-6.693
1.4	14.03	L1	-6.83
1.4	14.03	L1	-8.012
1.7	15.83	L1	-6.399
1.8	16.36	L1	-4.561
2	17.42	L1	-7.267
2.1	17.85	L1	-7.403
2.3	18.93	L1	-7.878
2.6	20.63	L1	-7.24
2.8	21.59	L1	-7.05
3.1	23.2	L1	-5.529
3.2	23.83	L1	-6.879
3.4	24.8	L1	-6.558
3.7	26.4	L1	-8.77
3.8	26.93	L1	-5.879
4.1	29.79	L1	-6.184
4.1	29.79	L1	-7.469
4.1	29.79	L1	-7.793
4.6	39.12	L1	-7.886
4.6	39.12	L1	-7.7
4.9	43.77	L1	-8.081
4.9	43.77	L1	-7.814
4.9	43.77	L1	-8.269
4.9	43.77	L1	-7.598
5	45.47	L1	-8.767
5	45.47	L1	-8.197
5	45.47	L1	-7.597
5.4	53.11	L1	-7.452
5.4	53.11	L1	-8.732
5.4	53.11	L1	-8.539
5.5	54.62	L1	-7.906
5.5	54.62	L1	-7.368
5.5	54.62	L1	-7.075
6.1	60.01	L1	-7.285
6.1	60.01	L1	-7.88
6.6	63.59	L1	-6.107
6.6	63.59	L1	-7.336
6.6	63.59	L1	-7.468
6.9	65.66	L1	-6.36
6.9	65.66	L1	-6.901
6.9	65.66	L1	-5.982
6.9	65.66	L1	-6.29
6.9	65.66	L1	-6.043
7.2	67.73	L1	-8.309
7.2	67.73	L1	-5.779
7.2	67.73	L1	-8.19
7.5	69.79	L1	-7.556
7.5	69.79	L1	-8.629
7.5	69.79	L1	-5.987
7.7	71.09	L1	-5.06
7.7	71.09	L1	-7.995
7.7	71.09	L1	-5.333
7.7	71.09	L1	-8.548
7.7	71.09	L1	-8.433
7.7	71.09	L1	-10.358
7.7	71.09	L1	-7.553
7.7	71.09	L1	-8.972
7.7	71.09	L1	-9.126
7.7	71.09	L1	-6.757
7.7	71.09	L1	-6.916
7.7	71.09	L1	-9.013
7.7	71.09	L1	-7.245
7.8	71.72	L1	-8.884
8	74.21	L1	-8.45
8	74.21	L1	-8.713
8	74.21	L1	-8.981
8.3	79.46	S1	-6.925
8.3	79.46	S1	-9.313
8.3	79.46	S1	-6.501
8.3	79.46	S1	-8.234
8.3	79.46	S1	-8.698
8.4	80.85	S1	-6.533
8.4	80.85	S1	-6.896
8.5	83.19	S1	-8.739
8.6	86.71	S1	-7.565
8.7	89.64	S1	-8.274
8.8	92.57	S1	-7.494
8.9	95.5	S1	-6.146
9.1	99.48	S1	-7.073
9.2	101.5	S1	-8.099
10.1	123.84	S1	-8.523
10.3	128	S1	-9.165
10.3	128	S1	-6.25
10.3	128	S1	-5.4
10.4	128.44	S1	-6.301
10.5	128.96	S1	-8.424
10.8	130.27	L2	-6.507
10.8	130.27	L2	-7.063
10.9	130.72	L2	-7.77
11	131.21	L2	-5.456
11.1	131.64	L2	-6.634
11.2	131.99	L2	-6.445
11.2	131.99	L2	-7.487
11.3	132.34	L2	-7.417
12.1	135.65	L2	-6.426
12.1	135.65	L2	-6.184
12.1	135.65	L2	-6.858
12.1	135.65	L2	-4.747
12.1	135.65	L2	-5.703
12.1	135.65	L2	-6.801
12.1	135.65	L2	-6.601
12.1	135.65	L2	-6.069
12.1	135.65	L2	-7.7
12.8	139	L2	-6.315
12.8	139	L2	-6.781
12.8	139	L2	-5.871
12.8	139	L2	-6.751
12.8	139	L2	-7.398
13.7	147.27	L2	-6.802
14.1	151	L2	-6.475
14.1	151	L2	-7.229
14.1	151	L2	-6.206
14.1	151	L2	-7.018
14.1	151	L2	-5.723
14.3	152.62	L2	-6.879
14.7	154.62	L2	-6.61
15	156.19	L2	-4.906
15	156.19	L2	-7.127
15	156.19	L2	-6.128
15	156.19	L2	-5.845
15.4	158.18	L2	-4.51
15.8	160.27	L2	-4.838
15.8	160.27	L2	-5.555
15.8	160.27	L2	-4.25
15.8	160.27	L2	-7.596
15.8	160.27	L2	-7.178
15.8	160.27	L2	-6.673
15.8	160.27	L2	-6.676
16	161.42	L2	-6.621
16.4	163.96	L2	-7.103
16.9	169.46	L2	-7.19
16.9	169.46	L2	-6.754
16.9	169.46	L2	-7.366
16.9	169.46	L2	-7.009
16.9	169.46	L2	-7.394
16.9	169.46	L2	-5.427
17.1	171.59	L2	-6.411
17.1	171.59	L2	-3.885
17.1	171.59	L2	-5.988
17.3	173.77	L2	-6.575
17.5	175.92	L2	-4.464
17.5	175.92	L2	-8.425
17.9	178.5	L2	-5.658
17.9	178.5	L2	-7.261
17.9	178.5	L2	-6.181
17.9	178.5	L2	-3.811
17.9	178.5	L2	-5.785
17.9	178.5	L2	-5.608
17.9	178.5	L2	-4.965
17.9	178.5	L2	-6.781
17.9	178.5	L2	-6.05
17.9	178.5	L2	-8.142
17.9	178.5	L2	-8.174
18.2	180.09	L2	-8.464
18.4	181.15	L2	-5.811
18.6	181.95	L2	-6.408
18.6	181.95	L2	-8.134
18.8	183	L2	-7.493
18.8	183	L2	-7.787
19	183.95	L2	-6.55
19	183.95	L2	-5.945
19	183.95	L2	-7.514
19.3	185.5	L2	-7.238
19.3	185.5	L2	-8.792
19.5	186.5	L2	-5.256
19.5	186.5	L2	-9.482
19.7	188.5	L2	-4.966
19.7	188.5	L2	-8.949
19.9	191.5	L2	-7.033
19.9	191.5	L2	-8.077
20.1	194.8	L2	-6.774
20.1	194.8	L2	-6.119
20.1	194.8	L2	-5.508
20.3	197.2	S2	-6.189
20.3	197.2	S2	-9.057
20.5	200.17	S2	-7.295
20.7	202.37	S2	-8.527
20.9	204.83	S2	-8.016
20.9	204.83	S2	-8.762
21	206	S2	-7.028
21	206	S2	-7.332
21.1	208.84	S2	-7.936
21.2	211.67	S2	-7.105
21.3	213.57	S2	-7.033
21.4	215.46	S2	-6.639
21.4	215.46	S2	-6.348
21.4	215.46	S2	-6.061
21.4	215.46	S2	-8.622
21.4	215.46	S2	-5.804
21.4	215.46	S2	-7.091
21.5	217.36	S2	-7.68
21.6	220.2	S2	-6.348
21.7	221	S2	-6.984
21.8	221.96	S2	-6.929
21.8	221.96	S2	-7.047
21.8	221.96	S2	-6.013
21.8	221.96	S2	-4.593
21.8	221.96	S2	-7.261
21.8	221.96	S2	-6.708
21.8	221.96	S2	-6.22
21.9	222.61	S2	-5.466
21.9	222.61	S2	-6.068
21.9	222.61	S2	-5.757
22	223.28	S2	-6.489
22.2	225.21	S2	-6.148
22.3	226.01	S2	-7.564
22.5	227.5	S2	-7.216
22.6	228.31	S2	-5.734
22.8	229.97	S2	-8.096
22.9	230.74	S2	-8.274
23.1	233.16	S2	-5.536
23.2	234.51	S2	-7.513
23.2	234.51	S2	-8.58
23.2	234.51	S2	-7.537
23.2	234.51	S2	-7.864
23.2	234.51	S2	-8.104
23.2	234.51	S2	-8.375
23.2	234.51	S2	-8.533
23.2	234.51	S2	-8.841
23.4	237.22	S2	-6.7
23.6	239.65	S2	-7.268
23.7	241	S2	-8.113
23.8	242.69	S2	-5.678
23.9	244.02	S2	-8.403
24	245.25	S2	-6.632
24	245.25	S2	-8.231
24.1	246.38	S2	-6.228
24.2	248.08	L3	-7.499
24.3	249.31	L3	-7.433
24.3	249.31	L3	-7.008
24.3	249.31	L3	-5.698
24.3	249.31	L3	-6.2
24.3	249.31	L3	-6.622
24.3	249.31	L3	-6.274
24.3	249.31	L3	-7.277
24.4	250.63	L3	-7.609
24.5	252.33	L3	-7.226
24.6	253.75	L3	-6.638
24.7	255.81	L3	-6.98
24.9	259.91	L3	-6.902
25.1	262.8	L3	-6.5
25.3	265.56	L3	-6.262
25.3	265.56	L3	-6.301
25.3	265.56	L3	-7.158
25.3	265.56	L3	-6.435
25.3	265.56	L3	-6.93
25.3	265.56	L3	-6.21
25.3	265.56	L3	-6.426
25.3	265.56	L3	-5.828
25.3	265.56	L3	-6.577
25.5	269.25	L3	-6.451
25.7	270.44	L3	-6.555
25.9	271.64	L3	-5.928
26.1	272.9	L3	-6.288
26.3	273.91	L3	-8.145
26.3	273.91	L3	-7.581
26.3	273.91	L3	-6.987
26.3	273.91	L3	-7.402
26.3	273.91	L3	-5.83
26.5	275.34	L3	-7.727
26.7	276.42	L3	-6.894
26.9	277.61	L3	-7.478
27.1	278.81	L3	-7.133
27.3	280	L3	-7.942
27.3	280	L3	-8.064
27.3	280	L3	-8.031
27.3	280	L3	-7.076
27.5	286.98	S3	-8.736
27.6	291.15	S3	-7.377
27.7	293.95	S3	-8.555
27.8	295.46	S3	-8.395
27.9	296.67	S3	-7.754
28	298.48	S3	-7.942
28.1	300.24	S3	-9.041
28.2	301.45	S3	-6.96
28.3	303	S3	-8.986
28.3	303	S3	-7.664
28.5	308.12	S3	-8.308
28.6	310.68	S3	-7.36
28.7	313.75	S3	-8.765
28.8	315.8	S3	-7.852
28.9	317.2	S3	-5.843
29	318.34	S3	-6.353
29.1	319.31	S3	-7.118
29.2	320.5	S3	-6.415
29.2	320.5	S3	-6.261
29.3	321.66	S3	-6.749
29.4	322.83	S3	-7.359
29.4	322.83	S3	-6.196
29.4	322.83	S3	-6.659
29.4	322.83	S3	-5.556
29.5	324	S3	-7.313
29.6	326.21	S3	-8.334
29.8	330.49	S3	-6.802
29.8	330.49	S3	-5.02
29.9	332.45	S3	-7.638
29.9	332.45	S3	-2.801
30	335.05	S3	-5.649
30	335.05	S3	-5.256
30.1	335.75	L4	-4.218
30.2	336.44	L4	-6.498
30.3	337.14	L4	-7.909
30.5	338.42	L4	-6.557
30.5	338.42	L4	-4.943
30.7	339.93	L4	-4.985
31	342.02	L4	-4.863
31.2	343.41	L4	-5.386
31.4	344.8	L4	-6.25
31.4	344.8	L4	-4.614
31.6	346.19	L4	-7.569
31.6	346.19	L4	-6.009
31.6	346.19	L4	-5.12
31.8	347.66	L4	-7.058
31.8	347.66	L4	-5.691
32	349.33	L4	-6.52
32	349.33	L4	-5.138
32	349.33	L4	-8.601
32.3	351.07	L4	-5.961
32.5	352.33	L4	-7.187
32.5	352.33	L4	-7.95
32.7	353.88	L4	-8.255
32.7	353.88	L4	-7.186
32.7	353.88	L4	-7.075
32.9	355.17	L4	-6.887
32.9	355.17	L4	-6.283
33.1	357.47	L4	-7.902
33.3	361.28	L4	-7.24
33.3	361.28	L4	-7.184
33.5	365.48	L4	-6.683
33.5	365.48	L4	-8.352
33.7	368.52	L4	-7.067
33.9	372.71	L4	-7.647
34.1	377.87	L4	-8.754
34.1	377.87	L4	-7.878
34.3	382.2	L4	-8.172
34.5	386.56	L4	-7.941
34.7	392.28	L4	-9.121
34.7	392.28	L4	-9.332
34.7	392.28	L4	-9.04
34.7	392.28	L4	-9.291
34.9	395.85	L4	-8.698
34.9	395.85	L4	-8.875
35	397.51	S4	-6.053
35.2	400.82	S4	-8.89
35.2	400.82	S4	-7.845
35.4	404.12	S4	-8.535
35.4	404.12	S4	-8.709
35.5	405.44	S4	-7.965
35.6	407.11	S4	-7.858
35.6	407.11	S4	-8.056
35.6	407.11	S4	-7.995
35.6	407.11	S4	-9.703
35.6	407.11	S4	-9.871
35.7	409.09	S4	-8.235
35.8	410.74	S4	-8.525
35.8	410.74	S4	-8.586
35.9	412.07	S4	-6.082
36	414.05	S4	-6.602
36.1	415.7	S4	-8.53
36.2	417.25	S4	-7.828
36.4	419.37	S4	-7.078
36.7	423.13	S4	-8.231
36.8	424.54	S4	-6.655
36.9	426.1	S4	-7.929
37	426.5	S4	-7.519
37.1	426.91	S4	-8.449
37.2	427.31	S4	-6.631
37.3	427.71	L5	-7.354
37.4	428.11	L5	-8.349
37.4	428.11	L5	-5.482
37.4	428.11	L5	-8.41
37.5	428.59	L5	-1.902
37.6	429	L5	-7.146
37.6	429	L5	-6.589
37.6	429	L5	-5.791
37.7	429.47	L5	-6.119
37.8	429.84	L5	-8.119
37.9	430.17	L5	-3.163
38	430.49	L5	-6.568
38	430.49	L5	-7.021
38.1	430.81	L5	-7.712
38.1	430.81	L5	-6.201
38.2	431.13	L5	-5.577
38.2	431.13	L5	-5.805
38.3	431.62	L5	-6.393
38.3	431.62	L5	-6.044
38.4	432	L5	-7.476
38.4	432	L5	-6.89
38.5	432.47	L5	-6.658
38.5	432.47	L5	-5.728
38.6	432.95	L5	-6.532
38.6	432.95	L5	-7.599
38.6	432.95	L5	-5.996
38.6	432.95	L5	-6.458
38.6	432.95	L5	-6.476
38.6	432.95	L5	-7.104
38.6	432.95	L5	-7.842
38.6	432.95	L5	-5.713
38.6	432.95	L5	-7.528
38.6	432.95	L5	-5.875
38.6	432.95	L5	-5.961
38.7	433.43	L5	-7.692
38.7	433.43	L5	-6.74
38.9	434.33	L5	-7.813
39.1	435.01	L5	-6.016
39.3	435.78	L5	-7.582
39.3	435.78	L5	-8.24
39.5	436.58	L5	-7.821
39.5	436.58	L5	-7.267
39.5	436.58	L5	-6.795
39.5	436.58	L5	-6.65
39.7	437.39	L5	-7.909
39.7	437.39	L5	-8.336
39.9	438.19	L5	-7.188
39.9	438.19	L5	-8.116
40.1	439	L5	-6.919
40.1	439	L5	-5.816
40.3	442.3	L5	-6.346
40.3	442.3	L5	-5.598
40.3	442.3	L5	-6.618
40.5	444.95	L5	-6.829
40.5	444.95	L5	-7.96
40.7	447.7	L5	-7.352
40.7	447.7	L5	-8.034
40.9	451.3	L5	-5.604
40.9	451.3	L5	-6.486
40.9	451.3	L5	-5.308
40.9	451.3	L5	-8.96
41.1	454	L5	-7.254
41.3	456.4	L5	-7.489
41.3	456.4	L5	-8.637
41.5	460	L5	-6.9
41.5	460	L5	-7.522
41.5	460	L5	-6.732
41.7	463	L5	-8.274
41.9	464.57	L5	-7.114
41.9	464.57	L5	-8.42
42.1	466.14	L5	-7.444
42.1	466.14	L5	-8.732
42.2	466.92	L5	-8.071
42.2	466.92	L5	-8.743
42.4	468.66	L5	-7.205
42.4	468.66	L5	-8.176
42.4	468.66	L5	-6.323
42.4	468.66	L5	-6.688
42.4	468.66	L5	-7.34
42.4	468.66	L5	-6.453
42.4	468.66	L5	-7.98
42.4	468.66	L5	-8.414
42.4	468.66	L5	-9.237
42.6	469.92	L5	-6.93
42.6	469.92	L5	-8.418
42.8	471.64	L5	-7.913
42.8	471.64	L5	-5.381
43	473.21	L5	-5.774
43.2	475.92	L5	-8.35

## Sheet: mean
shell δ13C values of fossil snails from Xifeng section (mean values by depth)
depth	age	layer	numbers of snails	δ13Cshell	δ13Cshell range
0.1	0	S0	1	-7.276
0.2	1.07	S0	2	-8.212	0.2
0.4	3.47	S0	1	-6.761
0.5	5.07	S0	2	-6.719	1.92
0.6	6.67	S0	1	-3.438
0.7	8.26	S0	1	-6.447
0.8	9.6	S0	2	-5.2295	0.573
0.9	10.67	S0	1	-5.952
1	12	S0	1	-5.87
1.1	12.63	L1	2	-3.8045	3.345
1.2	13.16	L1	1	-7.542
1.4	14.03	L1	4	-6.983	1.615
1.7	15.83	L1	1	-6.399
1.8	16.36	L1	1	-4.561
2	17.42	L1	1	-7.267
2.1	17.85	L1	1	-7.403
2.3	18.93	L1	1	-7.878
2.6	20.63	L1	1	-7.24
2.8	21.59	L1	1	-7.05
3.1	23.2	L1	1	-5.529
3.2	23.83	L1	1	-6.879
3.4	24.8	L1	1	-6.558
3.7	26.4	L1	1	-8.77
3.8	26.93	L1	1	-5.879
4.1	29.79	L1	3	-7.14867	1.609
4.6	39.12	L1	2	-7.793	0.186
4.9	43.77	L1	4	-7.9405	0.671
5	45.47	L1	3	-8.187	1.17
5.4	53.11	L1	3	-8.241	1.28
5.5	54.62	L1	3	-7.44967	0.831
6.1	60.01	L1	2	-7.5825	0.595
6.6	63.59	L1	3	-6.97033	1.361
6.9	65.66	L1	5	-6.3152	0.919
7.2	67.73	L1	3	-7.426	2.53
7.5	69.79	L1	3	-7.39067	2.642
7.7	71.09	L1	13	-7.793	5.298
7.8	71.72	L1	1	-8.884
8	74.21	L1	3	-8.71467	0.531
8.3	79.46	S1	5	-7.9342	2.812
8.4	80.85	S1	2	-6.7145	0.363
8.5	83.19	S1	1	-8.739
8.6	86.71	S1	1	-7.565
8.7	89.64	S1	1	-8.274
8.8	92.57	S1	1	-7.494
8.9	95.5	S1	1	-6.146
9.1	99.48	S1	1	-7.073
9.2	101.5	S1	1	-8.099
10.1	123.84	S1	1	-8.523
10.3	128	S1	3	-6.93833	3.765
10.4	128.44	S1	1	-6.301
10.5	128.96	S1	1	-8.424
10.8	130.27	L2	2	-6.785	0.556
10.9	130.72	L2	1	-7.77
11	131.21	L2	1	-5.456
11.1	131.64	L2	1	-6.634
11.2	131.99	L2	2	-6.966	1.042
11.3	132.34	L2	1	-7.417
12.1	135.65	L2	9	-6.34322	2.953
12.8	139	L2	5	-6.6232	1.527
13.7	147.27	L2	1	-6.802
14.1	151	L2	5	-6.5302	1.506
14.3	152.62	L2	1	-6.879
14.7	154.62	L2	1	-6.61
15	156.19	L2	4	-6.0015	2.221
15.4	158.18	L2	1	-4.51
15.8	160.27	L2	7	-6.10943	3.346
16	161.42	L2	1	-6.621
16.4	163.96	L2	1	-7.103
16.9	169.46	L2	6	-6.85667	1.967
17.1	171.59	L2	3	-5.428	2.526
17.3	173.77	L2	1	-6.575
17.5	175.92	L2	2	-6.4445	3.961
17.9	178.5	L2	11	-6.21964	4.363
18.2	180.09	L2	1	-8.464
18.4	181.15	L2	1	-5.811
18.6	181.95	L2	2	-7.271	1.726
18.8	183	L2	2	-7.64	0.294
19	183.95	L2	3	-6.66967	1.569
19.3	185.5	L2	2	-8.015	1.554
19.5	186.5	L2	2	-7.369	4.226
19.7	188.5	L2	2	-6.9575	3.983
19.9	191.5	L2	2	-7.555	1.044
20.1	194.8	L2	3	-6.13367	1.266
20.3	197.2	S2	2	-7.623	2.868
20.5	200.17	S2	1	-7.295
20.7	202.37	S2	1	-8.527
20.9	204.83	S2	2	-8.389	0.746
21	206	S2	2	-7.18	0.304
21.1	208.84	S2	1	-7.936
21.2	211.67	S2	1	-7.105
21.3	213.57	S2	1	-7.033
21.4	215.46	S2	6	-6.76083	2.818
21.5	217.36	S2	1	-7.68
21.6	220.2	S2	1	-6.348
21.7	221	S2	1	-6.984
21.8	221.96	S2	7	-6.39586	2.668
21.9	222.61	S2	3	-5.76367	0.602
22	223.28	S2	1	-6.489
22.2	225.21	S2	1	-6.148
22.3	226.01	S2	1	-7.564
22.5	227.5	S2	1	-7.216
22.6	228.31	S2	1	-5.734
22.8	229.97	S2	1	-8.096
22.9	230.74	S2	1	-8.274
23.1	233.16	S2	1	-5.536
23.2	234.51	S2	8	-8.16837	1.328
23.4	237.22	S2	1	-6.7
23.6	239.65	S2	1	-7.268
23.7	241	S2	1	-8.113
23.8	242.69	S2	1	-5.678
23.9	244.02	S2	1	-8.403
24	245.25	S2	2	-7.4315	1.599
24.1	246.38	S2	1	-6.228
24.2	248.08	L3	1	-7.499
24.3	249.31	L3	7	-6.64457	1.735
24.4	250.63	L3	1	-7.609
24.5	252.33	L3	1	-7.226
24.6	253.75	L3	1	-6.638
24.7	255.81	L3	1	-6.98
24.9	259.91	L3	1	-6.902
25.1	262.8	L3	1	-6.5
25.3	265.56	L3	9	-6.45856	1.33
25.5	269.25	L3	1	-6.451
25.7	270.44	L3	1	-6.555
25.9	271.64	L3	1	-5.928
26.1	272.9	L3	1	-6.288
26.3	273.91	L3	5	-7.189	2.315
26.5	275.34	L3	1	-7.727
26.7	276.42	L3	1	-6.894
26.9	277.61	L3	1	-7.478
27.1	278.81	L3	1	-7.133
27.3	280	L3	4	-7.77825	0.988
27.5	286.98	S3	1	-8.736
27.6	291.15	S3	1	-7.377
27.7	293.95	S3	1	-8.555
27.8	295.46	S3	1	-8.395
27.9	296.67	S3	1	-7.754
28	298.48	S3	1	-7.942
28.1	300.24	S3	1	-9.041
28.2	301.45	S3	1	-6.96
28.3	303	S3	2	-8.325	1.322
28.5	308.12	S3	1	-8.308
28.6	310.68	S3	1	-7.36
28.7	313.75	S3	1	-8.765
28.8	315.8	S3	1	-7.852
28.9	317.2	S3	1	-5.843
29	318.34	S3	1	-6.353
29.1	319.31	S3	1	-7.118
29.2	320.5	S3	2	-6.338	0.154
29.3	321.66	S3	1	-6.749
29.4	322.83	S3	4	-6.4425	1.803
29.5	324	S3	1	-7.313
29.6	326.21	S3	1	-8.334
29.8	330.49	S3	2	-5.911	1.782
29.9	332.45	S3	2	-5.2195	4.837
30	335.05	S3	2	-5.4525	0.393
30.1	335.75	L4	1	-4.218
30.2	336.44	L4	1	-6.498
30.3	337.14	L4	1	-7.909
30.5	338.42	L4	2	-5.75	1.614
30.7	339.93	L4	1	-4.985
31	342.02	L4	1	-4.863
31.2	343.41	L4	1	-5.386
31.4	344.8	L4	2	-5.432	1.636
31.6	346.19	L4	3	-6.23267	2.449
31.8	347.66	L4	2	-6.3745	1.367
32	349.33	L4	3	-6.753	3.463
32.3	351.07	L4	1	-5.961
32.5	352.33	L4	2	-7.5685	0.763
32.7	353.88	L4	3	-7.50533	1.18
32.9	355.17	L4	2	-6.585	0.604
33.1	357.47	L4	1	-7.902
33.3	361.28	L4	2	-7.212	0.056
33.5	365.48	L4	2	-7.5175	1.669
33.7	368.52	L4	1	-7.067
33.9	372.71	L4	1	-7.647
34.1	377.87	L4	2	-8.316	0.876
34.3	382.2	L4	1	-8.172
34.5	386.56	L4	1	-7.941
34.7	392.28	L4	4	-9.196	0.292
34.9	395.85	L4	2	-8.7865	0.177
35	397.51	S4	1	-6.053
35.2	400.82	S4	2	-8.3675	1.045
35.4	404.12	S4	2	-8.622	0.174
35.5	405.44	S4	1	-7.965
35.6	407.11	S4	5	-8.6966	2.013
35.7	409.09	S4	1	-8.235
35.8	410.74	S4	2	-8.5555	0.061
35.9	412.07	S4	1	-6.082
36	414.05	S4	1	-6.602
36.1	415.7	S4	1	-8.53
36.2	417.25	S4	1	-7.828
36.4	419.37	S4	1	-7.078
36.7	423.13	S4	1	-8.231
36.8	424.54	S4	1	-6.655
36.9	426.1	S4	1	-7.929
37	426.5	S4	1	-7.519
37.1	426.91	S4	1	-8.449
37.2	427.31	S4	1	-6.631
37.3	427.71	L5	1	-7.354
37.4	428.11	L5	3	-7.41367	2.928
37.5	428.59	L5	1	-1.902
37.6	429	L5	3	-6.50867	1.355
37.7	429.47	L5	1	-6.119
37.8	429.84	L5	1	-8.119
37.9	430.17	L5	1	-3.163
38	430.49	L5	2	-6.7945	0.453
38.1	430.81	L5	2	-6.9565	1.511
38.2	431.13	L5	2	-5.691	0.228
38.3	431.62	L5	2	-6.2185	0.349
38.4	432	L5	2	-7.183	0.586
38.5	432.47	L5	2	-6.193	0.93
38.6	432.95	L5	11	-6.644	2.129
38.7	433.43	L5	2	-7.216	0.952
38.9	434.33	L5	1	-7.813
39.1	435.01	L5	1	-6.016
39.3	435.78	L5	2	-7.911	0.658
39.5	436.58	L5	4	-7.13325	1.171
39.7	437.39	L5	2	-8.1225	0.427
39.9	438.19	L5	2	-7.652	0.928
40.1	439	L5	2	-6.3675	1.103
40.3	442.3	L5	3	-6.18733	1.02
40.5	444.95	L5	2	-7.3945	1.131
40.7	447.7	L5	2	-7.693	0.682
40.9	451.3	L5	4	-6.5895	3.652
41.1	454	L5	1	-7.254
41.3	456.4	L5	2	-8.063	1.148
41.5	460	L5	3	-7.05133	0.79
41.7	463	L5	1	-8.274
41.9	464.57	L5	2	-7.767	1.306
42.1	466.14	L5	2	-8.088	1.288
42.2	466.92	L5	2	-8.407	0.672
42.4	468.66	L5	9	-7.53511	2.914
42.6	469.92	L5	2	-7.674	1.488
42.8	471.64	L5	2	-6.647	2.532
43	473.21	L5	1	-5.774
43.2	475.92	L5	1	-8.35

## Sheet: G50243
Bao, R., et al., 2023, 100 k.y. pacing of the East Asian summer monsoon over the past five glacial cycles inferred from land snails: Geology, https://doi.org/10.1130/G50243.1
